# Supplementary material
Source: PubMed Central journal article supplement (PMC2860056)

# GENEVA Process Workflow

Genotype Data

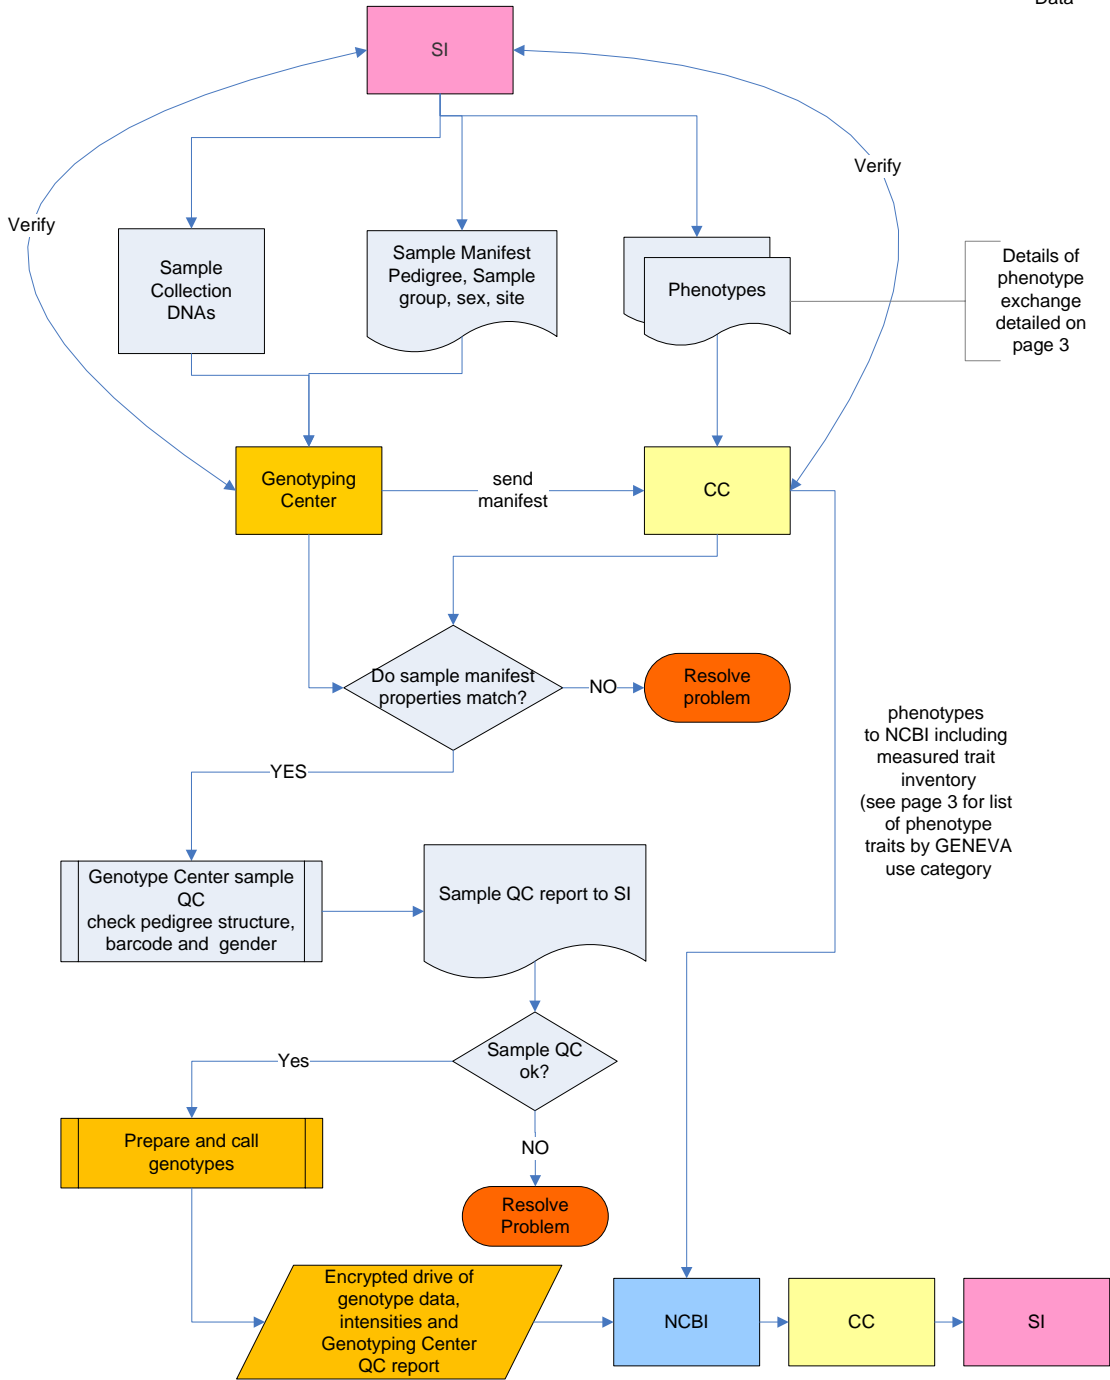

Continued on page 2

8/18/2009

# GENEVA Process Workflow

Genotype Data  
(page 2)

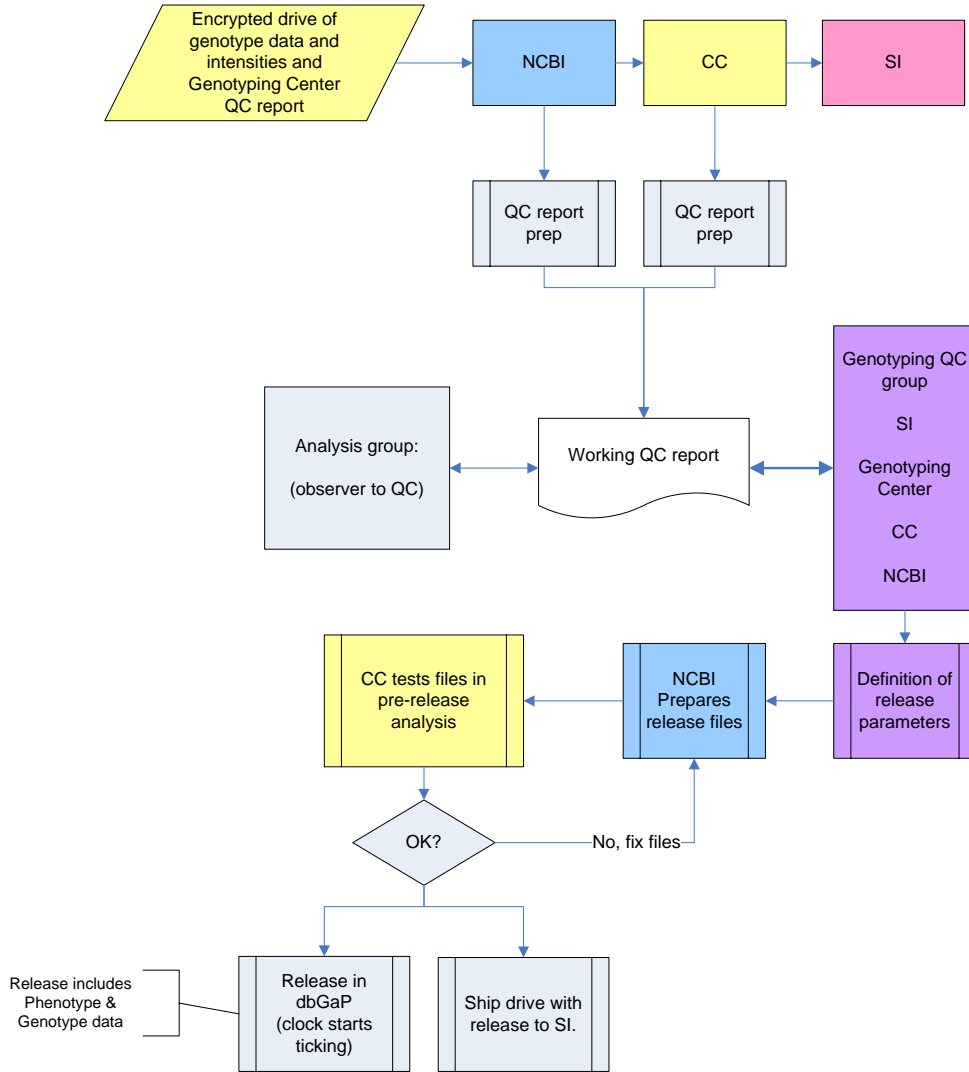

8/18/2009

# GENEVA Process Workflow

Phenotype Data

## Data flow for documentation

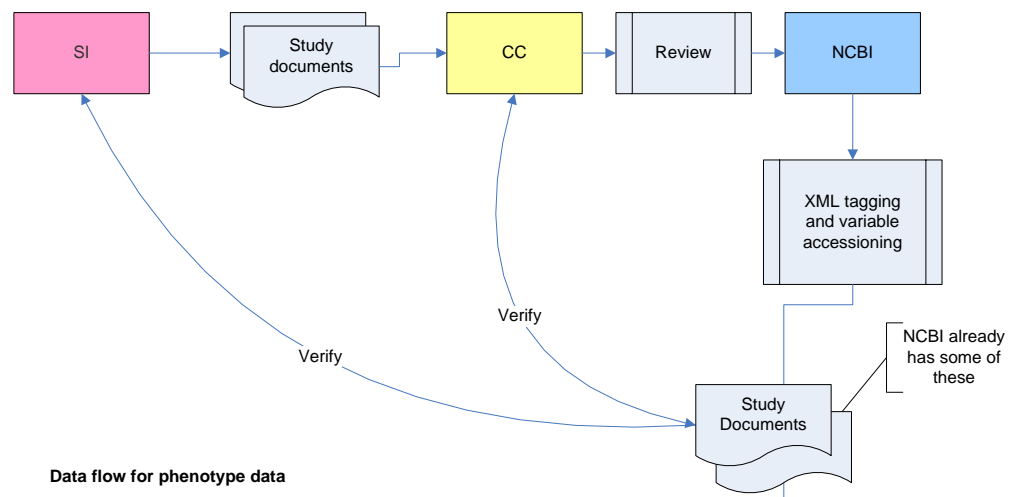

## Data flow for phenotype data

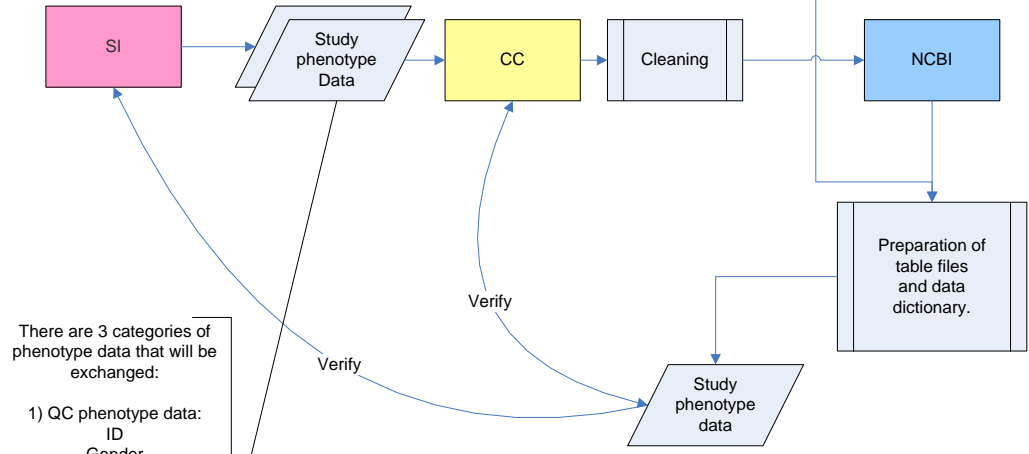

- There are 3 categories of phenotype data that will be exchanged:
- 1) QC phenotype data:
    - ID
    - Gender
    - Pedigree
    - Outcome/Affection
  - 2) Agreed Variables described in the grant submission
  - 3) Additional phenotypes Common, identified by phenotyping group and Additional data studies agree to submit beyond (2)

## Symbol legend

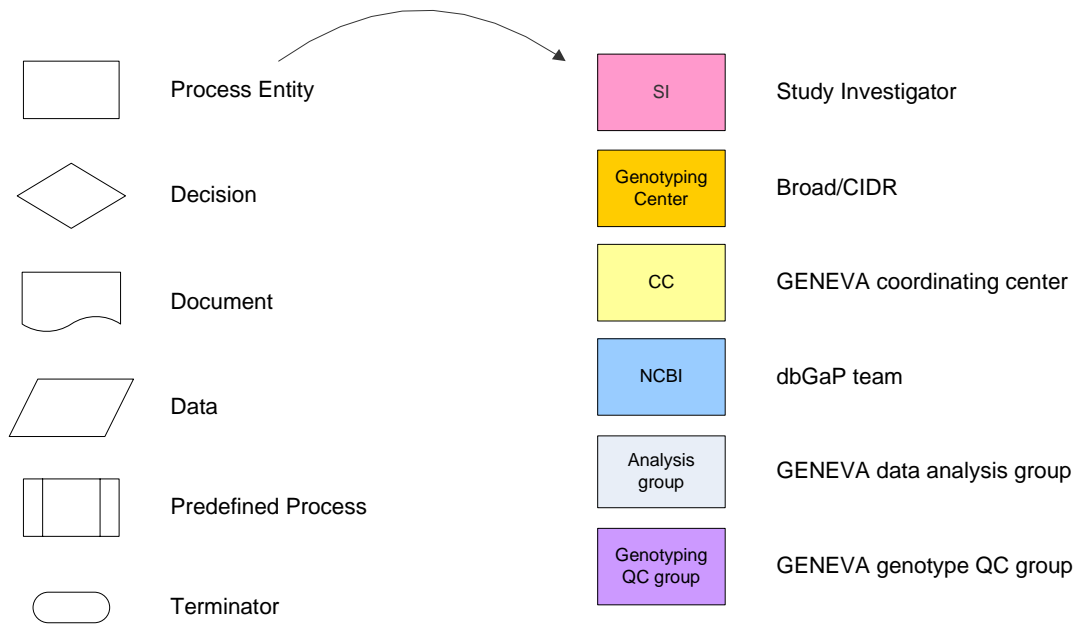

Supplement: NIHMS176834-supplement-SupplementaryData.pdf [file NIHMS176834-supplement-SupplementaryData.pdf]
